# Supplementary material for: Complexation by α- and β-cyclodextrinα- and β-cyclodextrin = cyclomaltohexaose and cyclomaltoheptaose, respectively. C(6) linked homo- and hetero-dimers of Brilliant Yellow tetraanion: a study of host–guest size relationshipsElectronic supplementary information (ESI) available: Figs. S1–S4 with spectra. See http://www.rsc.org/suppdata/p2/b2/b200026c/
Source: Royal Society of Chemistry journal article supplement (doi:10.1039/b200026c), 2002-03-28
Supplement: b200026c.doc [file b200026c.doc]

# Supplementary data

**Complexation by - and -Cyclodextrin† C(6) Linked Homo- and Hetero-Dimers of Brilliant Yellow Tetraanion: A Study of Host-Guest Size Relationships**

Marta M. Cieslinski, *a* Philip Clements, *a* Bruce L. May, *a* Christopher J. Easton and Stephen F. Lincoln*a**

Email stephen.lincoln@adelaide.edu.au

*aDepartment of Chemistry, The University of Adelaide, Adelaide, SA 5000, Australia*

*bResearch School of Chemistry, The Australian National University, Canberra, ACT 0200, Australia*

**Fig. S1**. a) The variation of the molar absorbance of **4** (8.78 x 10-6 mol dm-3) as [CD]total increases in the range 1.00 x 10-6 – 1.00 x 10-3 mol dm-3 at pH 10.00, *I* = 0.10 mol dm-3 and 298.2 K. b) The variation of the molar absorbance of **4** (8.78 x 10-6 mol dm-3) as [**3**]total increases in the range 1.00 x 10-6 – 1.00 x 10-3 mol dm-3. In both cases the arrows indicate the direction of absorbance change with increase in [CD]total and [**3**]total.

**Fig. S2**. The 2D 1H ROESY NMR (599.957 MHz) spectrum of a D2O solution 0.014 mol dm-3 in CD and **4** at pD ≥ 11 an 298.2 K. The rectangle encloses the cross-peaks arising from ROE interactions between the protons of **4** and the CD protons H3, H5 and H6.

**Fig. S3**. The 2D 1H ROESY NMR (599.957 MHz) spectrum of a D2O solution 0.015 mol dm-3 in **1** and in **4** at pD ≥ 11 an 298.2 K. The rectangles enclose the cross-peaks arising from ROE interactions between the protons of **4** and the CD component protons of **1**, H3, H5 and H6.

**Fig. S4**. The 2D 1H ROESY NMR (599.957 MHz) spectrum of a D2O solution 0.013 mol dm-3 in **3** and **4** at pD ≥ 11 an 298.2 K. The rectangles enclose the cross-peaks arising from ROE interactions between the protons of **4** and the CD component protons of **3**, H3, H5 and H6.
